# Supplementary material
Source: PubMed Central journal article supplement (PMC6322878)
Supplement: supp_RA118.005392_140153_1_supp_232572_phxmkq.pdf [file supp_RA118.005392_140153_1_supp_232572_phxmkq.pdf]

## The TRPC5 channel regulates angiogenesis to promote recovery from ischemic injury

Yifei Zhu<sup>1,2†</sup>, Mengru Gao<sup>1†</sup>, Tingting Zhou<sup>1†</sup>, Mingxu Xie<sup>2</sup>, Aiqin Mao<sup>1</sup>, Lei Feng<sup>1</sup>,  
Xiaoqiang Yao<sup>2</sup>, Wing Tak Wong<sup>3</sup>, Xin Ma<sup>1\*</sup>

### Supporting information

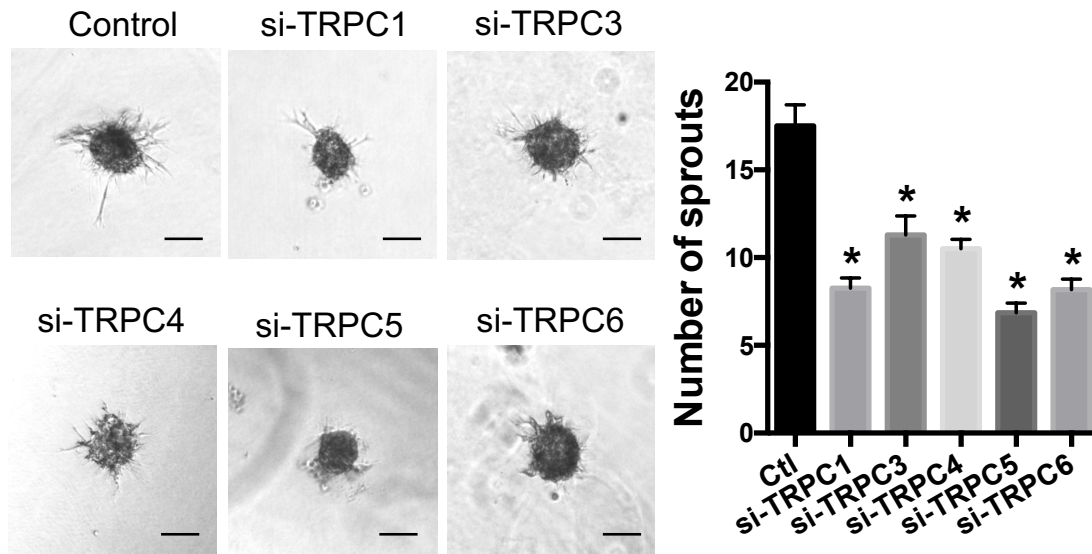

**Figure S1. Involvement of TRPC channels in *in vitro* EC sprouting under hypoxia.**

Left: representative images of spheroid sprouts in mouse primary mesenteric endothelial cells (MMECs) pretreated with control or TRPC siRNA under hypoxia (1% O<sub>2</sub>). The values are the means  $\pm$  SEM of  $n = 6$  independent experiments. \* $P < 0.05$  versus control (Ctl), one-way ANOVA and Dunnett's multiple comparison test. Scale bars: 100  $\mu$ m.

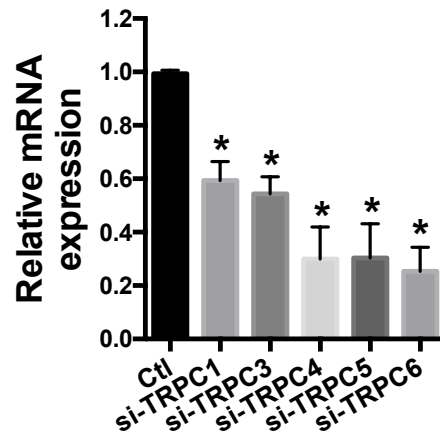

**Figure S2. Effect of siRNA treatment on the mRNA expression of corresponding TRP channels.**

Scrambled siRNA and targeted siRNAs were added to mouse primary mesenteric endothelial cells under hypoxia (1% O<sub>2</sub>). After 48 hours, RNA was extracted, and quantitative real time-polymerase chain reaction was performed to determine the mRNA level of corresponding TRP channels. The values are the means  $\pm$  SEM of  $n = 3$  independent experiments. \* $P < 0.05$  versus control (Ctl), one-way ANOVA and Dunnett's multiple comparison test.

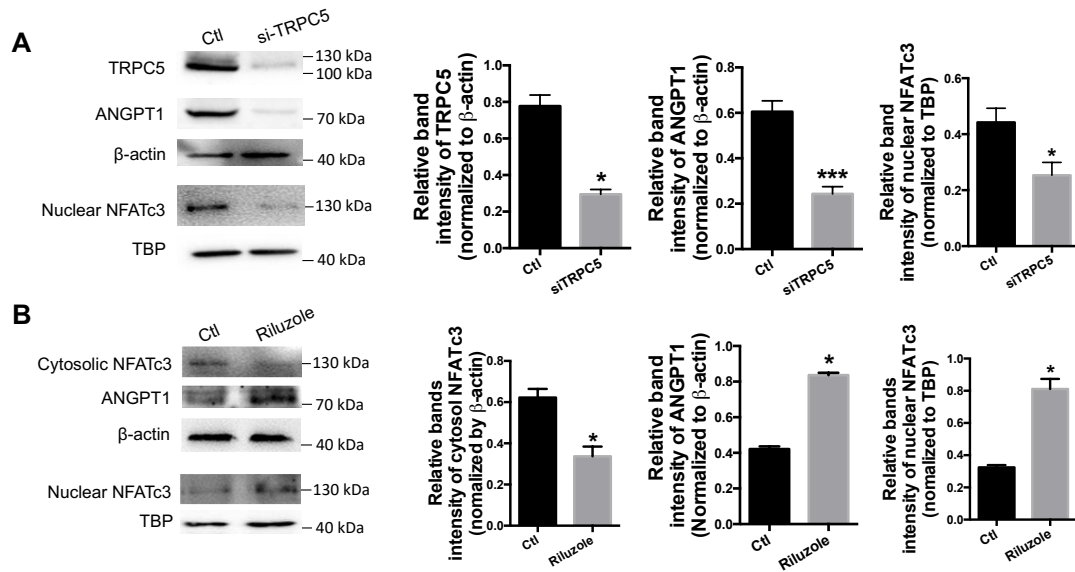

**Figure S3. TRPC5 influences NFATc3 and ANGPT1 expression.**

(A) Mouse primary mesenteric endothelial cells (MMECs) were treated with TRPC5-siRNA or scrambled-siRNA. Nuclear protein extracts were used for NFATc3 analysis. Whole-cell lysates were used for TRPC5 and ANGPT1 analyses. For TRPC5 analysis,  $*P < 0.05$  versus control (Ctl), unpaired Mann Whitney test. For NFATc3 and ANGPT1 analysis,  $*P < 0.05$ ,  $***P < 0.001$  versus Ctl. Student's unpaired two-tailed  $t$  test. (B) Primary MMECs were treated with or without riluzole (50  $\mu$ M) for 12 hours. Cytoplasmic and nuclear extracts for NFATc3 detection and whole cell lysates for ANGPT1 detection were analyzed by western blot.  $*P < 0.05$  versus Ctl, unpaired Mann-Whitney test. (A and B) TBP (TATA-binding protein) is the loading control in the nuclear, and  $\beta$ -actin protein is the control in cytoplasmic or whole cell proteins.

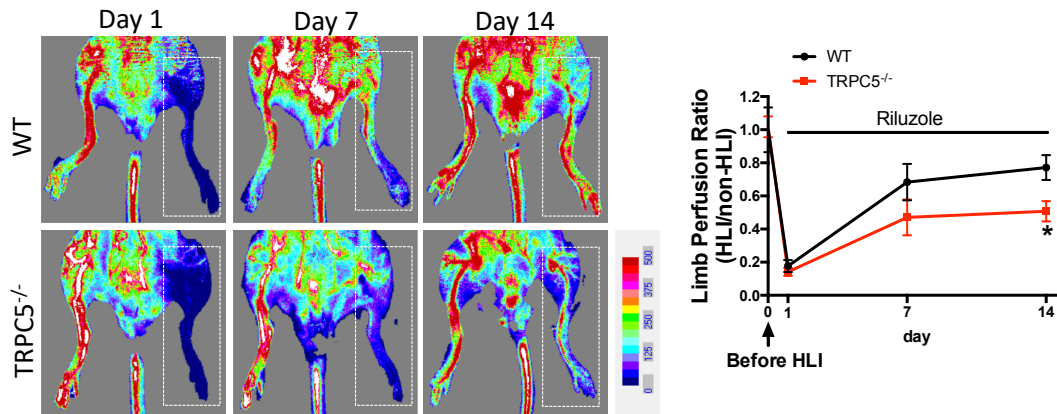

**Figure S4. The restoration of hind-limb blood flow after ischemia surgery in TRPC5 wildtype and TRPC5<sup>-/-</sup> mice under riluzole treatment.**

Hind-limb ischemia was surgically induced in WT and TRPC5<sup>-/-</sup> mice. Mice were treated with riluzole (10mg/kg/day) after the surgery. The blood flow was determined by laser Doppler imager at days 1, 7 and 14 after hind-limb ischemia. Left: representative images of hind-limb blood flow. Ischemic limbs are highlighted by white dashed box. Right: Comparison of limb perfusion ratios between WT and TRPC5<sup>-/-</sup> mice measured on days 1, 7, and 14 after HLI. The final blood flow values are expressed as the ratios of ischemic to non-ischemic hind limb perfusion.  $n = 4$ . \* $P < 0.05$  versus control at day14, Student's unpaired two-tailed  $t$  test.

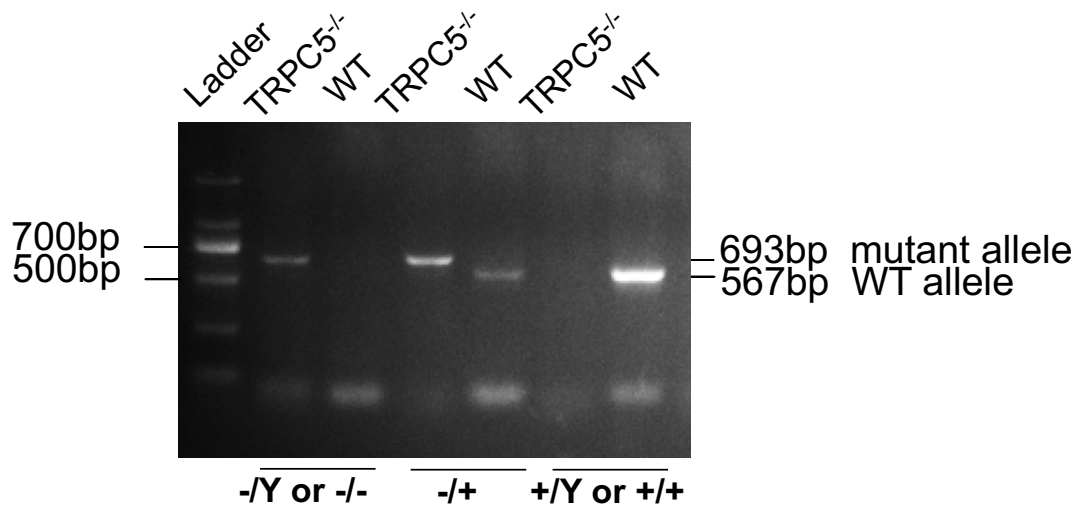

**Figure S5. Genotyping of TRPC5 wildtype and knockout mice.**

Representative PCR genotyping gel image of TRPC5<sup>-/-</sup>, wildtype (WT), and heterozygous mice. Mouse tail genomic DNA was used to determine the genotypes. The sequences of the primers for TRPC5<sup>-/-</sup> mouse genotyping were as follows: forward primer 1 (F1)- 5'GTAAGTGATACTAGGTATGGGGTATGGAGG, reverse primer 1 (R1)-5'GTCGACACACGTATAAGGCATACTCTTG 3'. The sequences of the primers for TRPC5 WT mouse genotyping were as follows: F1- 5'GTAAGTGATACTAGGTATGGGGTATGGAGG 3', reverse primer 2 (R2)- 5'CTAACCATTCTTCTCACCTCTCTCTCCTC 3'. The F1/R1 primer combination generated an amplicon of 693 bp, and the F1/R2 primer combination generated one amplicon of 567 bp. The PCR conditions were as follows: 1) 95 °C for 2 min; 35 cycles of 2) 95 °C for 30 sec; 3) 58 °C for 45 sec; 4) 72 °C for 1 min; and a final step of, 5) 72 °C for 10 min.

**Table S1 TRPC gene-specific primers for RT-PCR**

| <b>Target gene</b> | <b>Primer sequence (5'-3')</b>  |
|--------------------|---------------------------------|
| <b>TRPC1</b>       | Forward: AGCCTCTTGACAAACGAGGA   |
|                    | Reverse: TCTTACAGGTGGGCTTACGG   |
| <b>TRPC3</b>       | Forward: GCCTTCATGTTTCGGTGCTC   |
|                    | Reverse: GCGTTCTGGCCCATGTAGT    |
| <b>TRPC4</b>       | Forward: GCGGACTCCAGGATTACATC   |
|                    | Reverse: CCATGATTCCCGTGGGTTCAG  |
| <b>TRPC5</b>       | Forward: GGGCTGAGACTGAGCTGTC    |
|                    | Reverse: TTGCGGATGGCGTAGAGTAAT  |
| <b>TRPC6</b>       | Forward: AGCCAGGACTATTTGCTGATGG |
|                    | Reverse: AACCTTCTCCCTTCTCACGA   |
| <b>GAPDH</b>       | Forward: CAAGAAGGTGGTGAAGCAGG   |
|                    | Reverse: TCAAAGGTGGAGGAGTGGGT   |

TRPC, transient receptor potential canonical; GAPDH, glyceraldehyde 3-phosphate dehydrogenase.
